# Supplementary material for: Long-Term, Real-World Kidney Outcomes with SGLT2i versus DPP4i in Type 2 Diabetes without Cardiovascular or Kidney Disease
Source: PubMed Central journal article supplement (PMC10564349; doi:10.2215/cjn.0000000000000218), 2023-06-29

## Long-Term, Real-World, Kidney Function Changes with SGLT2i versus DPP4i Type 2 Diabetes without Cardiovascular or Kidney Disease

Cheli Melzer-Cohen\*<sup>1</sup>, Meir Schechter\*<sup>2,3,4</sup>, Aliza Rozenberg<sup>2,3</sup>, Ilan Yanuv<sup>2,3</sup>, Dvora R. Sehtman-Shachar<sup>2,3</sup>, Alisa Fishkin<sup>2,3</sup>, Doron Rosenzweig<sup>5</sup>, Gabriel Chodick<sup>1,6</sup>, Avraham Karasik<sup>1,7</sup>, Ofri Mosenzon<sup>2,3,\*\*</sup>

\* These authors have equally contributed

\*\* Present address: Regeneron Pharmaceutical Inc.

<sup>1</sup> Maccabi Institute for Research and Innovation, Maccabi Healthcare Services, Tel-Aviv, Israel

<sup>2</sup> Diabetes Unit, Department of Endocrinology and Metabolism, Hadassah Medical Center, Jerusalem, Israel

<sup>3</sup> Faculty of Medicine, Hebrew University of Jerusalem, Jerusalem, Israel

<sup>4</sup> Department of Clinical Pharmacy and Pharmacology, University Medical Center Groningen, University of Groningen, Groningen, The Netherlands

<sup>5</sup> Boehringer Ingelheim RCV GmbH and Co. KG, Vienna, Austria

<sup>6</sup> School of Public Health Sackler, Faculty of Medicine, Tel Aviv University, Tel Aviv, Israel

<sup>7</sup> Tel Aviv University, Tel Aviv, Israel

Corresponding author:

Ofri Mosenzon MD MSc

OFRIM@hadassah.org.il

The Diabetes Unit, Department of Endocrinology and Metabolism

Hadassah Ein Kerem Medical Center

P.O.B 12000

Jerusalem 9112001

Israel

Supplemental Methods.

Supplemental Table 1A: Variables definitions based on ICD-9 codes, ATC codes, and Maccabi Healthcare Services' registries.

Supplemental Table 1B: International Classification of Diseases, Ninth Revision [ICD-9] diagnosis codes and Current Procedural Terminology used for defining the cardiovascular disease registry.

Supplemental Table 2: Baseline characteristics of any SGLT2i or any DPP4i initiators before propensity-score matching.

Supplemental Table 3: Censoring causes during the trials per each cohort, follow-up definition, and by treatment arm.

Supplemental Table 4: Follow-up durations in the intention-to-treat and as-treated analyses.

Supplemental Table 5: Baseline characteristics before and after propensity score matching with empagliflozin versus any DPP4i.

Supplemental Table 6: The association between initiation of empagliflozin, compared with any DPP4i, and the risks of the kidney-specific or kidney-or-death outcomes, in the whole trial population.

Supplemental Figure 1: A CONSORT diagram describing the formation of the study population.

Supplemental Figure 2: The association between initiation of SGLT2i, compared with DPP4i, and the risk of (A) the kidney-specific or (B) kidney-or-death outcome, by subgroups.

## Supplemental Methods

The following baseline variables were used for the propensity score matching:

Demographics: age, sex, socioeconomic status (1-3, 4-5, 6-7, 8-10), time of entering into study (by year and quartiles), body mass index (BMI; <25, 25-<30, 30-<35, 35-<40, 40+, missing; kg/m<sup>2</sup>), smoking status (current smoker, past smoker, never smoker, missing), systolic blood pressure, and diastolic blood pressure.

Co-morbidities: duration (years) of diabetes (<=2, 2-5, 5-10, 10+ years), ischemic heart disease, myocardial infarction, after cardiac revascularization procedure, unstable angina, stable angina, atrial fibrillation, heart failure, cerebrovascular disease, stroke, transient ischemic attack, peripheral vascular disease, bariatric surgery, hypertension, hyperlipidemia, cancer, diabetic neuropathy, diabetic nephropathy, diabetic retinopathy or other ophthalmic manifestations, diabetic foot or lower extremity amputation, erectile dysfunction, acute kidney injury, liver disease, osteoarthritis, obstructive sleep apnea, chronic obstructive pulmonary disease (COPD), hypothyroidism, anxiety, depression, and psychoses.

Medications: metformin, sulfonylureas, glucagon-like peptide-1 receptor agonists, thiazolidinediones, meglitinides, alpha-glucosidase inhibitors, long-acting insulin, fast-acting insulin, pre-mix or intermediate insulin, angiotensin-converting-enzyme inhibitor, angiotensin II receptor blocker, antihypertensive drugs, calcium channel blocker, thiazides, loop diuretics, other diuretics, nitrates, other hypertension drugs, statins, PCSK-9 inhibitors, other lipid-lowering drugs (excluding statins), COPD or asthma medications, antiplatelet, anticoagulants, heparin and other low-molecular weight heparins, oral corticosteroids, nonsteroidal anti-inflammatory drug, opioids, antidepressants, antipsychotics, anti-Parkinson agents, mineralocorticoid receptor antagonists, digoxin, agents for dementia, lithium, anti-arrhythmic drugs, bisphosphonates, anti-convulsants, Benzodiazepines, and proton pump inhibitors.

Laboratory examinations: UACR (urine albumin below detectable levels, <15, 15-30, 30-300, 300+, mg/g, or missing), total cholesterol, low-density cholesterol, high-density cholesterol, triglycerides, eGFR, baseline eGFR slope, fasting-plasma glucose, ALT, AST, alkaline phosphatase, BUN, platelets count, and bilirubin.

### Definition of history of cardiovascular disease

Evidence of cardiovascular disease was based on the Maccabi Healthcare Systems' (MHS)' registry. Inclusion in this registry requires that patients will be diagnosed at least twice by a hospital or outpatient cardiologist, a primary physician, or a pediatrician, with at least one clinical diagnosis according to the International Classification of Diseases, Ninth Revision [ICD-9] diagnosis coding, or with a relevant Current Procedural Terminology code (see in **Supplementary Table S1B**).

**Supplemental Table 1A:** Variables definitions based on ICD-9 codes, ATC codes, and Maccabi Healthcare Services' registries.

| <b>Covariate</b>                       | <b>Definition</b>                                                                                                                                                                                                                            |
|----------------------------------------|----------------------------------------------------------------------------------------------------------------------------------------------------------------------------------------------------------------------------------------------|
| Age                                    | Age at treatment initiation                                                                                                                                                                                                                  |
| Sex                                    | female, male                                                                                                                                                                                                                                 |
| Weight                                 | Last evaluation during baseline period                                                                                                                                                                                                       |
| Height                                 | Last evaluation during baseline period                                                                                                                                                                                                       |
| Socioeconomic status                   | A 1-10 scale of socioeconomic status (1-low, 10-high), including data from Israel Central Bureau of Statistics as well as updates on new settlements.                                                                                        |
| Blood pressure                         | Last evaluation during baseline period                                                                                                                                                                                                       |
| Smoking status                         | Last recorded status during baseline period                                                                                                                                                                                                  |
| <b>Co-morbidities</b>                  | Entered into cardiovascular disease major registry prior to index date                                                                                                                                                                       |
| Atherosclerotic cardiovascular disease | Included in MHS cardiovascular disease major registry any time prior to index date                                                                                                                                                           |
| Ischemic heart disease                 | Included in MHS IHD registry any time prior to index date                                                                                                                                                                                    |
| Myocardial infarction registry         | Included in MHS MI registry any time prior to index date                                                                                                                                                                                     |
| Myocardial infarction                  | ICD-9 codes 410.x                                                                                                                                                                                                                            |
| PCI (Diagnostic and therapeutic)       | ICD-9 codes: 00.66, V45.82, 36.0                                                                                                                                                                                                             |
| CABG                                   | ICD-9 codes: V45.81, 36.1                                                                                                                                                                                                                    |
| Cerebrovascular disease                | Included in MHS registry any time prior to index date                                                                                                                                                                                        |
| Stroke                                 | Included in MHS stroke registry any time prior to index date                                                                                                                                                                                 |
| Transient ischemic attack              | Included in MHS TIA registry any time prior to index date                                                                                                                                                                                    |
| Peripheral vascular disease            | Included in MHS PVD registry any time prior to index date or ICD-9 codes: 440.20 – 440.24, 440.29 – 440.32, 440.3, 440.4, 443.9, 38.18, 38.19 , '39.25', '39.29' , '38.08', '38.09', '38.38', '38.39','38.48', '38.49', '39.5X' , '39.9'     |
| Congestive heart disease               | Included in MHS CHF registry prior to 1.1.2020                                                                                                                                                                                               |
| Atrial fibrillation                    | Included in MHS AF registry prior to 1.1.2020                                                                                                                                                                                                |
| unstable angina                        | ICD-9 code: 411.x                                                                                                                                                                                                                            |
| Stable angina                          | ICD-9 code: 413.x                                                                                                                                                                                                                            |
| Bariatric surgery                      | CPT codes: 43644, 43842, 43845, 43848                                                                                                                                                                                                        |
| Hypertension                           | Included in MHS HTN registry any time prior to index date                                                                                                                                                                                    |
| Hyperlipidemia                         | ICD-9 code: 272.0x-272.4x                                                                                                                                                                                                                    |
| Cancer                                 | Included in MHS cancer registry any time prior to index date                                                                                                                                                                                 |
| Erectile dysfunction                   | ICD-9 codes: 607.84 during baseline period                                                                                                                                                                                                   |
| Diabetes mellitus                      | Included in MHS diabetes registry prior to 1.1.2020. Diabetes type was based on registry's classification. Among patients without classification, if they were on fast acting insulin, they were considered as type 1. Otherwise, as type 2. |
| Diabetic neuropathy                    | ICD-9 codes: 250.6x, 357.2x, 337.1                                                                                                                                                                                                           |
| Diabetic nephropathy                   | ICD-9 codes: 250.4x, 583.81                                                                                                                                                                                                                  |

|                                                         |                                                                                                                                                                                                                        |
|---------------------------------------------------------|------------------------------------------------------------------------------------------------------------------------------------------------------------------------------------------------------------------------|
| Diabetic foot or lower extremity amputation             | ICD-9 codes: 707.1x, V49.7x (excluding V49.76 or V49.77)<br>Procedures: 84.10-84.17<br>CPT codes: 27590, 27880, 27884, 28800, 28820                                                                                    |
| Diabetic retinopathy or other ophthalmic manifestations | ICD-9 codes: 362.0x, 250.5x (without 362.01-362.07), 366.41 (diabetic cataract), 365.44 (diabetic glaucoma), 361.9x, 379.23,<br>Or procedures: 14.7x, 14.24, 14.34, 14.54                                              |
| Liver disease                                           | ICD-9 codes: 070.x, 570.x- 573.x 456.0x-456.2x, 576.8x, 782.4x, 789.5x, 39.1x, 42.91                                                                                                                                   |
| kidney failure or on dialysis                           | Stage 5 CKD based on eGFR evaluation, on dialysis in the past or after kidney transplantation; eGFR<15; ICD-9 CM codes: 585.5x, 585.6x , V56.0x, V56.8x, V45.1x , 39.95, 54.98 , V42.0x, 996.81 , 55.6x or on dialysis |
| Dialysis                                                | ICD-9 CM code: 39.95, V45.1, V56.0, V56.1; CPT codes: 90935, 90945 or as defined in CKD registry                                                                                                                       |
| Acute kidney injury that requires dialysis (ARF-D)      | ICD-9 CM code: 39.95, V45.1, V56.0, V56.1; CPT codes: 90935, 90945                                                                                                                                                     |
| Osteoarthritis                                          | ICD-9 codes: 715.x at baseline period                                                                                                                                                                                  |
| Obstructive Sleep Apnea                                 | ICD-9 codes: 327.23 at baseline period                                                                                                                                                                                 |
| Hypothyroidism                                          | ICD-9 codes: 244.X at baseline period                                                                                                                                                                                  |
| COPD                                                    | Included in MHS COPD registry any time prior to index date                                                                                                                                                             |
| Anxiety                                                 | ICD-9 codes: 293.84, 300.0x, 300.2x, 300.3x, 309.24, 308.0x, 309.81 at baseline period                                                                                                                                 |
| Depression                                              | ICD-9 codes: 293.83, 296.2x. 296.3x, 298.0x, 300.4x, 309.0x, 309.1x, 309.28, 311.xx at baseline period                                                                                                                 |
| Psychoses                                               | ICD-9 codes: 290.8x, 290.9x, 295.xx, 297.xx, 298.xx, 299.xx, 780.1x at baseline period                                                                                                                                 |
| Gestational ultrasound                                  | CPT codes: 58974, 59000, 76801, 76805, 76810, 76811, 76815, 76816, 76817, 78657, 9 months before index date and during treatment                                                                                       |
| <b>Concomitant medications</b>                          |                                                                                                                                                                                                                        |
| Angiotensin-converting-enzyme inhibitor                 | ≥1 filled dispensation/any other record of the drug use during baseline period.<br>ATC codes: C09A, C09B                                                                                                               |
| Angiotensin II receptor blocker                         | ≥1 filled dispensation/any other record of the drug use during baseline period.<br>ATC codes: C09C, C09D                                                                                                               |
| Beta-blocker                                            | ≥1 filled dispensation/any other record of the drug use during baseline period.<br>ATC codes: C07                                                                                                                      |
| Calcium channel blocker                                 | ≥1 filled dispensation/any other record of the drug use during baseline period.<br>ATC codes: C08, C07FB, C09BB, C09DB                                                                                                 |
| Thiazides                                               | ≥1 filled dispensation/any other record of the drug use during baseline period.<br>ATC codes: C03A                                                                                                                     |
| Loop diuretics                                          | ≥1 filled dispensation/any other record of the drug use during baseline period.<br>ATC codes: C03C                                                                                                                     |
| Other diuretics                                         | ≥1 filled dispensation/any other record of the drug use during baseline period.<br>ATC codes: C03D                                                                                                                     |
| Nitrates                                                | ≥1 filled dispensation/any other record of the drug use during baseline period.                                                                                                                                        |

|                                                 |                                                                                                                                                                                                                                                                                                                               |
|-------------------------------------------------|-------------------------------------------------------------------------------------------------------------------------------------------------------------------------------------------------------------------------------------------------------------------------------------------------------------------------------|
|                                                 | ATC codes: C01DA02, C01DA08, C01DA14, C01EB18                                                                                                                                                                                                                                                                                 |
| Other hypertension drugs                        | ≥1 filled dispensation/any other record of the drug use during baseline period.<br>ATC codes: C02CA04, C03DA04, C02CA01, G04CA03, C02AC01, C02AC02, C02DB02, C09XA02, C09XA52                                                                                                                                                 |
| PCSK-9 inhibitors                               | ≥1 filled dispensation/any other record of the drug use during baseline period.<br>ATC codes: C10AX13, C10AX14                                                                                                                                                                                                                |
| Statins                                         | ≥1 filled dispensation/any other record of the drug use during baseline period.<br>ATC codes: C10AA                                                                                                                                                                                                                           |
| Other lipid-lowering drugs, excluding statins   | ≥1 filled dispensation/any other record of the drug use during baseline period.<br>ATC codes: C10, excluding C10AA, C10BA, C10BX                                                                                                                                                                                              |
| COPD or asthma medications                      | ≥1 filled dispensation/any other record of the drug use during baseline period.<br>ATC codes: R03AK06, R03AK07, R03AC13, R03AC12, R03AC02, R03CC03, R01AX03, R03BB01, R03BB04, R03DA04, R03DC03, R03DC01, R03BB05, R03AL05, R03AC18, R03AC19, R03BB07, R03AL01, R03AL02, R03AL03, R03AL04, R03AL05, R03AL06, R03AL08, R03AL09 |
| Antiplatelet                                    | ≥1 filled dispensation/any other record of the drug use during baseline period.<br>ATC codes: B01AC06, B01AC04, B01AC22, B01AC05, B01AC07, B01AC23, B01AC24                                                                                                                                                                   |
| Anticoagulants                                  | ≥1 filled dispensation/any other record of the drug use during baseline period.<br>ATC codes: B01AA03, B01AE07, B01AF01, B01AF02                                                                                                                                                                                              |
| Heparin and other low-molecular weight heparins | ≥1 filled dispensation/any other record of the drug use during baseline period.<br>ATC codes: B01AB, B01AE07                                                                                                                                                                                                                  |
| Oral corticosteroids                            | ≥1 filled dispensation/any other record of the drug use during baseline period.<br>ATC codes: H02AB10, H02AB09, H02AB07, H02AB06, H02AB04, H02AB08, H02AB02, H02AB01                                                                                                                                                          |
| NSAIDs                                          | ≥1 filled dispensation/any other record of the drug use during baseline period.<br>ATC codes: M01A                                                                                                                                                                                                                            |
| Metformin                                       | ≥1 filled dispensation/any other record of the drug use during baseline period.<br>ATC codes: A10BA02, A10BD07, A10BD08, A10BD10, A10BD11, A10BD13                                                                                                                                                                            |
| Sulfonylureas 2nd generation                    | ≥1 filled dispensation/any other record of the drug use during baseline period.<br>ATC codes: A10BB                                                                                                                                                                                                                           |
| Dipeptidyl peptidase-4 inhibitors               | ≥1 filled dispensation/any other record of the drug use during baseline period.<br>ATC codes: A10BH, A10BD07, A10BD08, A10BD10, A10BD11, A10BD13, A10BD19, A10BD21, A10BD25                                                                                                                                                   |
| Glucagon-like peptide-1 receptor agonists       | ≥1 filled dispensation/any other record of the drug use during baseline period.<br>ATC codes: A10BJ                                                                                                                                                                                                                           |
| Thiazolidinediones                              | ≥1 filled dispensation/any other record of the drug use during baseline period.<br>ATC codes: A10BG                                                                                                                                                                                                                           |
| Meglitinides                                    | ≥1 filled dispensation/any other record of the drug use during baseline period.<br>ATC codes: A10BX02, A10BX03                                                                                                                                                                                                                |
| Insulin                                         | ≥1 filled dispensation/any other record of the drug use during baseline period.<br>ATC codes: A10A                                                                                                                                                                                                                            |

|                                                                        |                                                                                                                                           |
|------------------------------------------------------------------------|-------------------------------------------------------------------------------------------------------------------------------------------|
| Alpha-glucosidase inhibitors                                           | ≥1 filled dispensation/any other record of the drug use during baseline period.<br>ATC codes: A10BF                                       |
| SGLT-2i                                                                | ≥1 filled dispensation/any other record of the drug use during baseline period.<br>ATC codes: A10BD15, A10BD19, A10BD20, A10BD21, A10BD25 |
| Opioids                                                                | ≥1 filled dispensation/any other record of the drug use during baseline period.<br>ATC codes: N02A                                        |
| Antidepressants                                                        | ≥1 filled dispensation/any other record of the drug use during baseline period.<br>ATC codes: N06A                                        |
| Antipsychotics                                                         | ≥1 filled dispensation/any other record of the drug use during baseline period.<br>ATC codes: N05A                                        |
| Agents for dementia                                                    | ≥1 filled dispensation/any other record of the drug use during baseline period.<br>ATC codes: N06D                                        |
| Antiparkinson agents                                                   | ≥1 filled dispensation/any other record of the drug use during baseline period.<br>ATC codes: N04                                         |
| Mineralocorticoid receptor antagonists (MRAs; aldosterone antagonists) | ≥1 filled dispensation/any other record of the drug use during baseline period.<br>ATC codes: C03Da                                       |
| Digoxin                                                                | ≥1 filled dispensation/any other record of the drug use during baseline period.<br>ATC codes: C01AA05                                     |
| Neprilysin inhibitors (Valsartan and sacubitril)                       | ≥1 filled dispensation/any other record of the drug use during baseline period.<br>ATC codes: C09DX04                                     |
| Anti-arrhythmic drugs                                                  | ≥1 filled dispensation/any other record of the drug use during baseline period.<br>ATC codes: C01B                                        |
| Lithium                                                                | ≥1 filled dispensation/any other record of the drug use during baseline period.<br>ATC codes: N05AN                                       |
| Heparin/LMWH                                                           | ≥1 filled dispensation/any other record of the drug use during baseline period.<br>ATC codes: B01AB                                       |
| Bisphosphonates                                                        | ≥1 filled dispensation/any other record of the drug use during baseline period.<br>ATC codes: M05BA                                       |
| Anti-convulsant                                                        | ≥1 filled dispensation/any other record of the drug use during baseline period.<br>ATC codes: N03                                         |
| Benzodiazepines                                                        | ≥1 filled dispensation/any other record of the drug use during baseline period.<br>ATC codes: N03AE, N05B, N05C                           |
| Proton pump inhibitors                                                 | ≥1 filled dispensation/any other record of the drug use during baseline period.<br>ATC codes: A02BC                                       |
| <b>Laboratory examinations</b>                                         |                                                                                                                                           |
| Fasting plasma glucose (mg/dl)                                         | Last measurement during baseline period                                                                                                   |
| HbA1c (%)                                                              | Last measurement during baseline period                                                                                                   |
| Total cholesterol (mg/dl)                                              | Last measurement during baseline period                                                                                                   |
| High-density lipoprotein (HDL) level (mg/dl)                           | Last measurement during baseline period                                                                                                   |
| Low-density lipoprotein (LDL) level (mg/dl)                            | Last measurement during baseline period                                                                                                   |

|                            |                                                                                                                                 |
|----------------------------|---------------------------------------------------------------------------------------------------------------------------------|
| Triglyceride level (mg/dl) | Last measurement during baseline period                                                                                         |
| Creatinine (mg/dl)         | All evaluation in the past 2 years prior to index date. eGFR was calculated from serum creatinine by using CKD-epi equation.    |
| UACR (mg/g)                | All evaluations in the past 2 years prior to index date.                                                                        |
| Blood urea (mg/dl)         | Last measurement in the past 2 years prior to index date.                                                                       |
| Liver Function test        | Laboratory tests of: ALT, AST, Alkaline Phosphatase, bilirubin total. Last measurement in the past 2 years prior to index date. |
| Platelets count            | Last measurement in the past 2 years prior to index date.                                                                       |

**Supplemental Table 1B:** International Classification of Diseases, Ninth Revision [ICD-9] diagnosis codes and Current Procedural Terminology used for defining the cardiovascular disease registry.

| <b>Condition/procedure</b>                                                           | <b>Code(s)</b>                                                                                                 | <b>Code type</b> |
|--------------------------------------------------------------------------------------|----------------------------------------------------------------------------------------------------------------|------------------|
| Coronary artery bypass graft, percutaneous coronary intervention or vascular surgery | 33510, 33999, 92980, 92982, 92984, 33999, 33945, 33935, 35141, 35471, 33321, 35081, 37799, 35556, 35565, 75962 | CPT              |
| Cerebrovascular accident or transient ischaemic attack                               | 431.x, 433.x-435.x, 438.x, 997.02, 388.02, 342, 442.81, 38.12                                                  | ICD-9            |
| Heart failure                                                                        | 398.91, 404.01, 404.03, 404.11, 404.13, 404.91, 404.93, 428.x, 785.51                                          | ICD-9            |
| Ischaemic heart disease                                                              | 36.x, 411.x, 414.4, 429.1                                                                                      | ICD-9            |
| Myocardial infarction                                                                | 410.x, 412, 412.9, 429.7, 429.79                                                                               | ICD-9            |



**Supplemental Table 2:** Baseline characteristics of any SGLT2i or any DPP4i initiators before propensity-score matching.

| Variable                                                                                    |                | SGLT2i (n= 16065)     | DPP4i (n= 23208)      |
|---------------------------------------------------------------------------------------------|----------------|-----------------------|-----------------------|
| <b>Demographics</b>                                                                         |                |                       |                       |
| <b>Age (years); mean (SD)</b>                                                               |                | 61.5 (10.4)           | 62.5 (12.3)           |
| <b>Women (%); n (%)</b>                                                                     |                | 6046 (37.6)           | 10173 (43.8)          |
| <b>Socioeconomic status*; n (%)</b>                                                         | 1-3            | 2165 (13.5)           | 2656 (11.4)           |
|                                                                                             | 4-5            | 4705 (29.3)           | 6805 (29.3)           |
|                                                                                             | 6-7            | 5449 (33.9)           | 8425 (36.3)           |
|                                                                                             | 8-10           | 3721 (23.2)           | 5289 (22.8)           |
|                                                                                             | Missing        | 25 (0.2)              | 33 (0.1)              |
| <b>Year of study entry; n (%)</b>                                                           | 2015-2016      | 3895 (24.2)           | 8966 (38.7)           |
|                                                                                             | 2017-2018      | 5684 (35.4)           | 7670 (33.1)           |
|                                                                                             | 2019-2020      | 6486 (40.4)           | 6572 (28.3)           |
| <b>Medical history</b>                                                                      |                |                       |                       |
| <b>Years in diabetes registry; mean (SD)</b>                                                |                | 9.7 (6.3)             | 7.4 (5.8)             |
| <b>Established cardiovascular disease history**; n (%)</b>                                  |                | 4975 (31.0)           | 4343 (18.7)           |
| <b>Without evidence of cardiovascular or kidney disease; n (%)</b>                          |                | 7340 (45.7)           | 13081 (56.4)          |
| <b>Hypertension registry**; n (%)</b>                                                       |                | 10545 (65.6)          | 14359 (61.9)          |
| <b>History of smoking; n (%)</b>                                                            | Current smoker | 1989 (12.4)           | 2878 (12.4)           |
|                                                                                             | Past smoker    | 517 (3.2)             | 718 (3.1)             |
|                                                                                             | Never smoker   | 7407 (46.1)           | 10110 (43.6)          |
|                                                                                             | Unknown        | 6152 (38.3)           | 9502 (40.9)           |
| <b>BMI kg/m<sup>2</sup>; mean (SD), [number of patients with a measurement]</b>             |                | 32.5 (5.6), [14448]   | 31.1 (5.7), [20036]   |
| <b>HbA1c (%); mean (SD), [number of patients with a measurement]</b>                        |                | 8.2 (1.6), [16002]    | 8.1 (1.7), [22987]    |
| <b>Fasting plasma glucose (mg/dL); mean (SD), [number of patients with a measurement]</b>   |                | 172.9 (59.8), [15251] | 175.5 (62.6), [21773] |
| <b>Low-density lipoprotein (mg/dL); mean (SD), [number of patients with a measurement]</b>  |                | 88.9 (35.6), [14593]  | 98.4 (37.0), [20796]  |
| <b>High-density lipoprotein (mg/dL); mean (SD), [number of patients with a measurement]</b> |                | 42.5 (10.4), [15951]  | 44.4 (11.3), [22906]  |

|                                                                                                    |                        |                       |                       |
|----------------------------------------------------------------------------------------------------|------------------------|-----------------------|-----------------------|
| <b>Systolic blood pressure (mmHg);</b><br>mean (SD), [number of patients<br>with a measurement]    |                        | 133.3 (15.5), [15403] | 132.7 (15.6), [21954] |
| <b>Diastolic blood pressure<br/>(mmHg); mean (SD), [number of<br/>patients with a measurement]</b> |                        | 77.8 (9.6), [15403]   | 77.9 (9.7), [21954]   |
| <b>Medications</b>                                                                                 |                        |                       |                       |
| <b>Diabetes medications</b>                                                                        |                        |                       |                       |
| <b>Metformin; n (%)</b>                                                                            |                        | 14940 (93.0)          | 22009 (94.8)          |
| <b>Insulin; n (%)</b>                                                                              | All                    | 5573 (34.7)           | 2791 (12.0)           |
|                                                                                                    | Basal insulin          | 5238 (32.6)           | 2599 (11.2)           |
|                                                                                                    | Fast-acting<br>insulin | 1956 (12.2)           | 829 (3.6)             |
| <b>Sulfonylureas; n (%)</b>                                                                        |                        | 2732 (17.0)           | 3159 (13.6)           |
| <b>Glucagon-like peptide-1 receptor<br/>agonists; n (%)</b>                                        |                        | 4435 (27.6)           | 350 (1.5)             |
| <b>Thiazolidinediones; n (%)</b>                                                                   |                        | 1102 (6.9)            | 504 (2.2)             |
| <b>Cardiovascular medications</b>                                                                  |                        |                       |                       |
| <b>RAAS inhibitors; n (%)</b>                                                                      |                        | 11459 (71.3)          | 13973 (60.2)          |
| <b>Statin; n (%)</b>                                                                               |                        | 13242 (82.4)          | 17356 (74.8)          |
| <b>Beta blocker; n (%)</b>                                                                         |                        | 6743 (42.0)           | 7546 (32.5)           |
| <b>Antihypertensives; n (%)</b>                                                                    |                        | 12422 (77.3)          | 15796 (68.1)          |
| <b>Aldosterone antagonist; n (%)</b>                                                               |                        | 989 (6.2)             | 804 (3.5)             |
| <b>kidney markers</b>                                                                              |                        |                       |                       |
| <b>eGFR<br/>(ml/min/1.73m<sup>2</sup>);<br/>n (%)</b>                                              | >90                    | 8887 (55.3)           | 12291 (53.0)          |
|                                                                                                    | 60-90                  | 5838 (36.3)           | 7910 (34.1)           |
|                                                                                                    | 45-60                  | 1113 (6.9)            | 1822 (7.9)            |
|                                                                                                    | 30-45                  | 227 (1.4)             | 1185 (5.1)            |
|                                                                                                    | Mean (SD)              | 89.0 (18.1)           | 87.0 (20.8)           |
| <b>UACR (mg/g); n<br/>(%)</b>                                                                      | Below<br>detectable    | 5510 (34.3)           | 9079 (39.1)           |
|                                                                                                    | <15                    | 2303 (14.3)           | 3075 (13.2)           |
|                                                                                                    | 15-<30                 | 2115 (13.2)           | 2849 (12.3)           |
|                                                                                                    | 30-<300                | 4087 (25.4)           | 5107 (22.0)           |
|                                                                                                    | >=300                  | 1247 (7.8)            | 1266 (5.5)            |
|                                                                                                    | Missing                | 803 (5.0)             | 1832 (7.9)            |
|                                                                                                    | Median (IQR)           | 14.2 (0.0- 55.8)      | 10.4 (0.0- 40.2)      |

\* Socioeconomic status was ranked on a 1 (lowest) to 10 (highest) scale. This parameter was categorized into 4 groups (low [1-3], low-medium [4-5], medium [6-7], and high [8-10]).

\*\*Based on Maccabi Healthcare Services validated registries.

Abbreviations: BMI – body mass index; DPP4i - Dipeptidyl peptidase 4 inhibitors; eGFR – estimated glomerular filtration rate; GLP-1 RA – glucagon-like peptide 1 receptor agonist; RAAS – renin

angiotensin aldosterone system; SGLT2i – sodium-glucose transporter 2 inhibitors; UACR – urine albumin-to-creatinine ratio.

**Supplemental Table 3:** Censoring causes during the trials per each cohort, follow-up definition, and by treatment arm.

| <b>Cohort</b>                 |                      | <b>End of study<br/>September 30,<br/>2021, n (%)</b> | <b>Lost to follow-<br/>up, n (%)</b> | <b>Treatment<br/>discontinuation/<br/>switch, n (%)</b> | <b>All-cause<br/>mortality,<br/>n (%)</b> |
|-------------------------------|----------------------|-------------------------------------------------------|--------------------------------------|---------------------------------------------------------|-------------------------------------------|
| <b>Intention<br/>to treat</b> | <b>SGLT2i</b>        | 9335 (95.0)                                           | 109 (1.1)                            | NA                                                      | 380 (3.9)                                 |
|                               | <b>DPP4i</b>         | 9292 (94.6)                                           | 81 (0.8)                             | NA                                                      | 451 (4.6)                                 |
|                               | <b>Total</b>         | 18627 (94.8)                                          | 190 (1.0)                            | NA                                                      | 831 (4.2)                                 |
| <b>As treated</b>             | <b>SGLT2i</b>        | 4003 (40.7)                                           | 47 (0.5)                             | 5619 (57.2)                                             | 155 (1.6)                                 |
|                               | <b>DPP4i</b>         | 2795 (28.5)                                           | 38 (0.4)                             | 6820 (69.4)                                             | 171 (1.7)                                 |
|                               | <b>Total</b>         | 6798 (34.6)                                           | 85 (0.4)                             | 12439 (63.3)                                            | 326 (1.7)                                 |
| <b>Intention<br/>to treat</b> | <b>Empagliflozin</b> | 7614 (95.2)                                           | 80 (1.0)                             | NA                                                      | 302 (3.8)                                 |
|                               | <b>DPP4i</b>         | 7517 (94.0)                                           | 77 (1.0)                             | NA                                                      | 402 (5.0)                                 |
|                               | <b>Total</b>         | 15131 (94.6)                                          | 157 (1.0)                            | NA                                                      | 704 (4.4)                                 |
| <b>As treated</b>             | <b>Empagliflozin</b> | 3440 (43.0)                                           | 35 (0.4)                             | 4394 (55.0)                                             | 127 (1.6)                                 |
|                               | <b>DPP4i</b>         | 2343 (29.3)                                           | 37 (0.5)                             | 5445 (68.1)                                             | 171 (2.1)                                 |
|                               | <b>Total</b>         | 5783 (36.2)                                           | 72 (0.5)                             | 9839 (61.5)                                             | 298 (1.9)                                 |

Abbreviations: DPP4i - Dipeptidyl peptidase 4 inhibitors; SGLT2i – sodium-glucose transporter 2 inhibitors.

**Supplemental Table 4:** Follow-up durations in the intention-to-treat and as-treated analyses.

|                            | Intention-to-treat |                  |                  | As-treated      |                 |                 |
|----------------------------|--------------------|------------------|------------------|-----------------|-----------------|-----------------|
|                            | SGLT2i             | DPP4i            | Total            | SGLT2i          | DPP4i           | Total           |
| <b>Mean months (SD)</b>    | 39.2 (19.3)        | 39.0 (20.1)      | 39.1 (19.7)      | 21.3 (18.9)     | 18.7 (16.9)     | 20.0 (18.0)     |
| <b>Median months [IQR]</b> | 39.4 [21.9-54.9]   | 36.3 [21.9-55.0] | 37.9 [21.9-55.0] | 14.1 [6.0-31.7] | 12.7 [5.5-26.7] | 13.4 [5.8-28.9] |
| <b>Total person-years</b>  | 31647              | 31498            | 63145            | 17159           | 15066           | 33225           |

**Supplemental Table 5:** Baseline characteristics before and after propensity score matching with empagliflozin versus any DPP4i.

|                                                                    |                | Before matching          |                  | After matching          |                 |
|--------------------------------------------------------------------|----------------|--------------------------|------------------|-------------------------|-----------------|
| Variable                                                           |                | Empagliflozin (n= 12434) | DPP4i (n= 19269) | Empagliflozin (n= 7996) | DPP4i (n= 7996) |
| <b>Demographics</b>                                                |                |                          |                  |                         |                 |
| <b>Age (years); mean (SD)</b>                                      |                | 61.9 (10.4)              | 62.5 (12.3)      | 61.6 (10.9)             | 61.6 (12.2)     |
| <b>Women (%); n (%)</b>                                            |                | 4426 (35.6)              | 8477 (44.0)      | 3025 (37.8)             | 3055 (38.2)     |
| <b>Socioeconomic status*; n (%)</b>                                | 1-3            | 1526 (12.3)              | 2193 (11.4)      | 912 (11.4)              | 926 (11.6)      |
|                                                                    | 4-5            | 3661 (29.4)              | 5686 (29.5)      | 2368 (29.6)             | 2316 (29.0)     |
|                                                                    | 6-7            | 4268 (34.3)              | 7009 (36.4)      | 2818 (35.2)             | 2825 (35.3)     |
|                                                                    | 8-10           | 2957 (23.8)              | 4352 (22.6)      | 1885 (23.6)             | 1914 (23.9)     |
|                                                                    | Missing        | 22 (0.2)                 | 29 (0.2)         | 13 (0.2)                | 15 (0.2)        |
| <b>Year of study entry; n (%)</b>                                  | 2015-2016      | 2289 (18.4)              | 5027 (26.1)      | 1334 (16.7)             | 1434 (18.0)     |
|                                                                    | 2017-2018      | 4761 (38.3)              | 7670 (39.8)      | 3149 (39.4)             | 2887 (36.1)     |
|                                                                    | 2019-2020      | 5384 (43.3)              | 6572 (34.1)      | 3513 (43.9)             | 3675 (45.9)     |
| <b>Medical history</b>                                             |                |                          |                  |                         |                 |
| <b>Years in diabetes registry; mean (SD)</b>                       |                | 9.6 (6.3)                | 7.4 (5.9)        | 8.0 (6.0)               | 7.9 (5.9)       |
| <b>Established cardiovascular disease history**; n (%)</b>         |                | 4268 (34.3)              | 3479 (18.1)      | 2034 (25.4)             | 2038 (25.5)     |
| <b>Without evidence of cardiovascular or kidney disease; n (%)</b> |                | 5331 (42.9)              | 10898 (56.6)     | 4037 (50.5)             | 4133 (51.7)     |
| <b>Hypertension registry**; n (%)</b>                              |                | 8179 (65.8)              | 11778 (61.1)     | 4923 (61.6)             | 4958 (62.0)     |
| <b>History of smoking; n (%)</b>                                   | Current smoker | 1563 (12.6)              | 2275 (11.8)      | 1023 (12.8)             | 1002 (12.5)     |
|                                                                    | Past smoker    | 376 (3.0)                | 516 (2.7)        | 223 (2.8)               | 219 (2.7)       |
|                                                                    | Never smoker   | 5489 (44.1)              | 7682 (39.9)      | 3336 (41.7)             | 3346 (41.8)     |
|                                                                    | Unknown        | 5006 (40.3)              | 8796 (45.6)      | 3414 (42.7)             | 3429 (42.9)     |

|                                                                                              |                       |                       |                      |                      |
|----------------------------------------------------------------------------------------------|-----------------------|-----------------------|----------------------|----------------------|
| <b>BMI kg/m<sup>2</sup></b> ; mean (SD), [number of patients with a measurement]             | 32.3 (5.6), [11101]   | 31.1 (5.7), [16405]   | 31.7 (5.6), [6990]   | 31.9 (6.0), [6847]   |
| <b>HbA1c (%)</b> ; mean (SD), [number of patients with a measurement]                        | 8.1 (1.6), [12387]    | 8.0 (1.7), [19088]    | 8.0 (1.6), [7956]    | 8.0 (1.7), [7938]    |
| <b>Fasting plasma glucose (mg/dL)</b> ; mean (SD), [number of patients with a measurement]   | 172.6 (59.7), [11777] | 176.1 (62.9), [18009] | 173.9 (60.3), [7516] | 173.8 (60.7), [7465] |
| <b>Low-density lipoprotein (mg/dL)</b> ; mean (SD), [number of patients with a measurement]  | 88.1 (35.6), [11262]  | 98.3 (36.6), [17238]  | 94.2 (36.3), [7194]  | 92.9 (35.5), [7118]  |
| <b>High-density lipoprotein (mg/dL)</b> ; mean (SD), [number of patients with a measurement] | 42.4 (10.3), [12340]  | 44.4 (11.0), [19006]  | 43.4 (10.5), [7922]  | 43.5 (10.8), [7895]  |
| <b>Systolic blood pressure (mmHg)</b> ; mean (SD), [number of patients with a measurement]   | 133.4 (15.5), [11908] | 132.8 (15.7), [18176] | 133.2 (15.4), [7578] | 133.3 (15.7), [7572] |
| <b>Diastolic blood pressure (mmHg)</b> ; mean (SD), [number of patients with a measurement]  | 77.8 (9.6), [11908]   | 78.0 (9.7), [18176]   | 78.3 (9.7), [7578]   | 78.3 (9.8), [7572]   |
| <b>Medications</b>                                                                           |                       |                       |                      |                      |
| <b>Diabetes medications</b>                                                                  |                       |                       |                      |                      |
| <b>Metformin</b> ; n (%)                                                                     | 11619 (93.4)          | 18287 (94.9)          | 7487 (93.6)          | 7541 (94.3)          |
| <b>Insulin</b> ; n (%)                                                                       | All                   | 4036 (32.5)           | 2183 (11.3)          | 1483 (18.5)          |
|                                                                                              | Basal insulin         | 3802 (30.6)           | 2044 (10.6)          | 1378 (17.2)          |
|                                                                                              | Fast-acting insulin   | 1415 (11.4)           | 636 (3.3)            | 512 (6.4)            |
| <b>Sulfonylureas</b> ; n (%)                                                                 | 1955 (15.7)           | 2361 (12.3)           | 1028 (12.9)          | 1026 (12.8)          |
| <b>GLP-1 RA</b> ; n (%)                                                                      | 3078 (24.8)           | 246 (1.3)             | 258 (3.2)            | 245 (3.1)            |
| <b>Thiazolidinediones</b> ; n (%)                                                            | 738 (5.9)             | 396 (2.1)             | 272 (3.4)            | 273 (3.4)            |

| <b>Cardiovascular medications</b>                     |                  |                  |                  |                  |                  |
|-------------------------------------------------------|------------------|------------------|------------------|------------------|------------------|
| <b>RAAS inhibitors; n (%)</b>                         |                  | 8916 (71.7)      | 11457 (59.5)     | 5148 (64.4)      | 5114 (64.0)      |
| <b>Statin; n (%)</b>                                  |                  | 10313 (82.9)     | 14269 (74.1)     | 6236 (78.0)      | 6231 (77.9)      |
| <b>Beta blocker; n (%)</b>                            |                  | 5415 (43.5)      | 6159 (32.0)      | 2918 (36.5)      | 2912 (36.4)      |
| <b>Antihypertensives; n (%)</b>                       |                  | 9688 (77.9)      | 12971 (67.3)     | 5713 (71.4)      | 5719 (71.5)      |
| <b>Aldosterone antagonist; n (%)</b>                  |                  | 819 (6.6)        | 662 (3.4)        | 369 (4.6)        | 374 (4.7)        |
| <b>kidney markers</b>                                 |                  |                  |                  |                  |                  |
| <b>eGFR<br/>(ml/min/1.73m<sup>2</sup>);<br/>n (%)</b> | >90              | 6660 (53.6)      | 10239 (53.1)     | 4404 (55.1)      | 4404 (55.1)      |
|                                                       | 60-90            | 4624 (37.2)      | 6545 (34.0)      | 2853 (35.7)      | 2853 (35.7)      |
|                                                       | 45-60            | 958 (7.7)        | 1528 (7.9)       | 599 (7.5)        | 599 (7.5)        |
|                                                       | 30-45            | 192 (1.5)        | 957 (5.0)        | 140 (1.8)        | 140 (1.8)        |
|                                                       | Mean (SD)        | 88.2 (18.3)      | 87.1 (20.8)      | 88.7 (18.4)      | 89.2 (19.1)      |
| <b>UACR (mg/g); n<br/>(%)</b>                         | Below detectable | 4190 (33.7)      | 7354 (38.2)      | 2864 (35.8)      | 2913 (36.4)      |
|                                                       | <15              | 1797 (14.5)      | 2637 (13.7)      | 1191 (14.9)      | 1212 (15.2)      |
|                                                       | 15-<30           | 1637 (13.2)      | 2421 (12.6)      | 1048 (13.1)      | 1033 (12.9)      |
|                                                       | 30-<300          | 3195 (25.7)      | 4303 (22.3)      | 1921 (24.0)      | 1896 (23.7)      |
|                                                       | >=300            | 1003 (8.1)       | 1052 (5.5)       | 510 (6.4)        | 478 (6.0)        |
|                                                       | Missing          | 612 (4.9)        | 1502 (7.8)       | 462 (5.8)        | 464 (5.8)        |
|                                                       | Median (IQR)     | 14.5 (0.0- 58.5) | 10.8 (0.0- 40.9) | 12.2 (0.0- 46.8) | 12.0 (0.0- 43.8) |

\* Socioeconomic status was ranked on a 1 (lowest) to 10 (highest) scale. This parameter was categorized into 4 groups (low [1-3], low-medium [4-5], medium [6-7], and high [8-10]).

\*\*Based on Maccabi Healthcare Services validated registries.

Abbreviations: BMI – body mass index; DPP4i - Dipeptidyl peptidase 4 inhibitors; eGFR – estimated glomerular filtration rate; GLP-1 RA – glucagon-like peptide 1 receptor agonist; RAAS – renin angiotensin aldosterone system; SGLT2i – sodium-glucose transporter 2 inhibitors; UACR – urine albumin-to-creatinine ratio.



**Supplemental Table 6:** The association between initiation of empagliflozin, compared with any DPP4i, and the risks of the kidney-specific or kidney-or-death outcomes, in the whole trial population.

|                        | <b>Follow-up definition</b> | <b>Empagliflozin events (ER)</b> | <b>DPP4i Events (ER)</b> | <b>HR (95%CI)</b> | <b>P-Value</b> |
|------------------------|-----------------------------|----------------------------------|--------------------------|-------------------|----------------|
| <b>Kidney specific</b> | Intention-to-treat          | 175 (7.3)                        | 218 (9.1)                | 0.79 (0.65-0.97)  | 0.021          |
|                        | As-treated                  | 65 (4.7)                         | 98 (8.2)                 | 0.55 (0.40-0.76)  | <0.001         |
| <b>Kidney or Death</b> | Intention-to-treat          | 439 (18.3)                       | 575 (24.1)               | 0.76 (0.67-0.85)  | <0.001         |
|                        | As-treated                  | 182 (13.3)                       | 255 (21.4)               | 0.61 (0.51-0.73)  | <0.001         |

The kidney-specific composite outcome included sustained  $\geq 40\%$  eGFR decline or kidney failure. The kidney-or-death outcome included also all-cause mortality. Event rates are presented per 1000 patient-year. Hazard ratios (HR), 95% confidence intervals, and p-values were assessed using Cox proportional hazards regression models.

Abbreviations: DPP4i – Dipeptidyl peptidase 4 inhibitors; eGFR – estimated glomerular filtration rate; ER – event rate; UACR – urine albumin-to-creatinine ratio.

## Supplemental Figures

**Supplemental Figure 1:** A CONSORT diagram describing the formation of the study population.

**Abbreviations:** DPP4i – Dipeptidyl peptidase 4 inhibitors; eGFR – estimated glomerular filtration rate; MHS - Maccabi Healthcare Services; SGLT2i – sodium-glucose transporter 2 inhibitors.

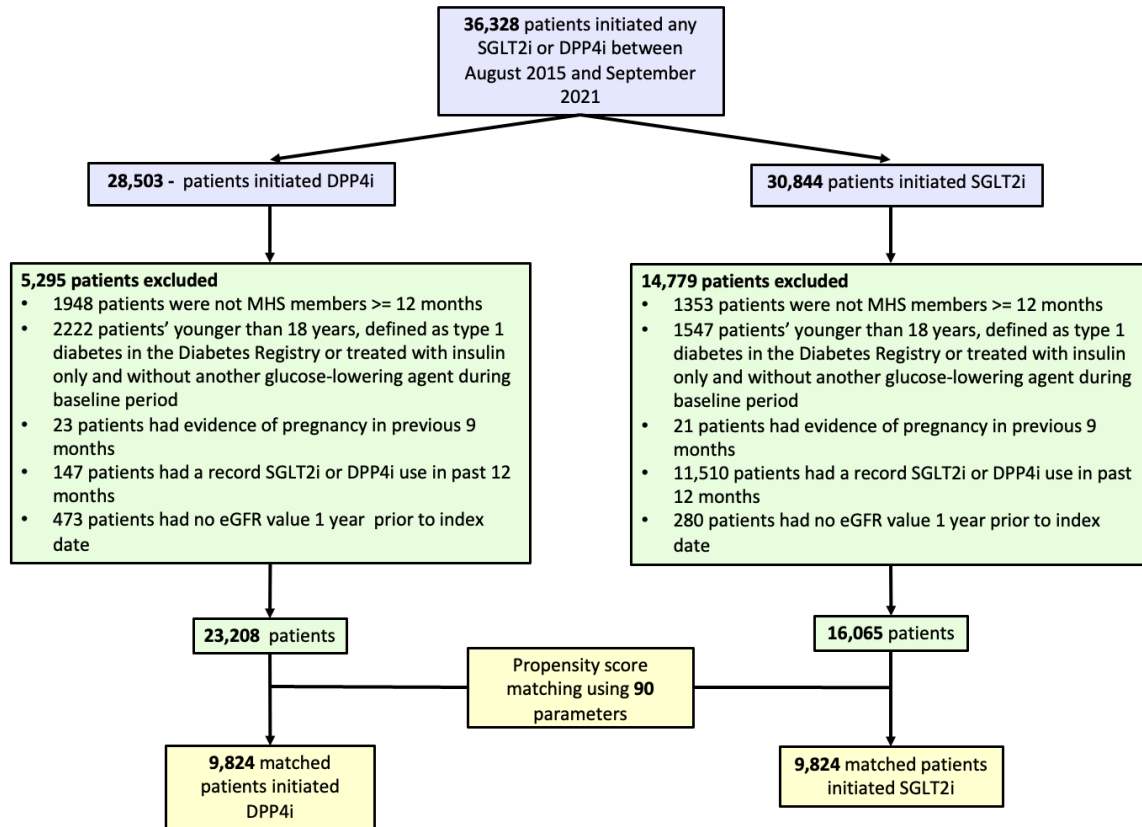

**Supplemental Figure 2:** The association between initiation of SGLT2i, compared with DPP4i, and the risk of (A) the kidney-specific or (B) kidney-or-death outcome, by subgroups.

The kidney-specific composite outcome included sustained  $\geq 40\%$  eGFR decline or kidney failure. The kidney-or-death outcome included also all-cause mortality. Without evidence of cardiovascular or kidney disease was defined by lack of the following: evidence of cardiovascular disease, eGFR $<60$  mL/min/1.73 m<sup>2</sup>, or UACR $\geq 30$  mg/g. Hazard ratios (HR), 95% confidence intervals, and p-values were assessed using Cox proportional hazards regression models.

**Abbreviations:** BDL – below detectable levels; BMI – body mass index; CVD – cardiovascular disease; CKD – chronic kidney disease; DPP4i - dipeptidyl peptidase 4 inhibitors; eGFR – estimated glomerular filtration rate; HbA1c – glycated hemoglobin A1c; RAAS – renin angiotensin aldosterone system; SGLT2i – sodium-glucose transporter 2 inhibitors; UACR – urine albumin-to-creatinine ratio.

**A – Kidney-specific outcome**

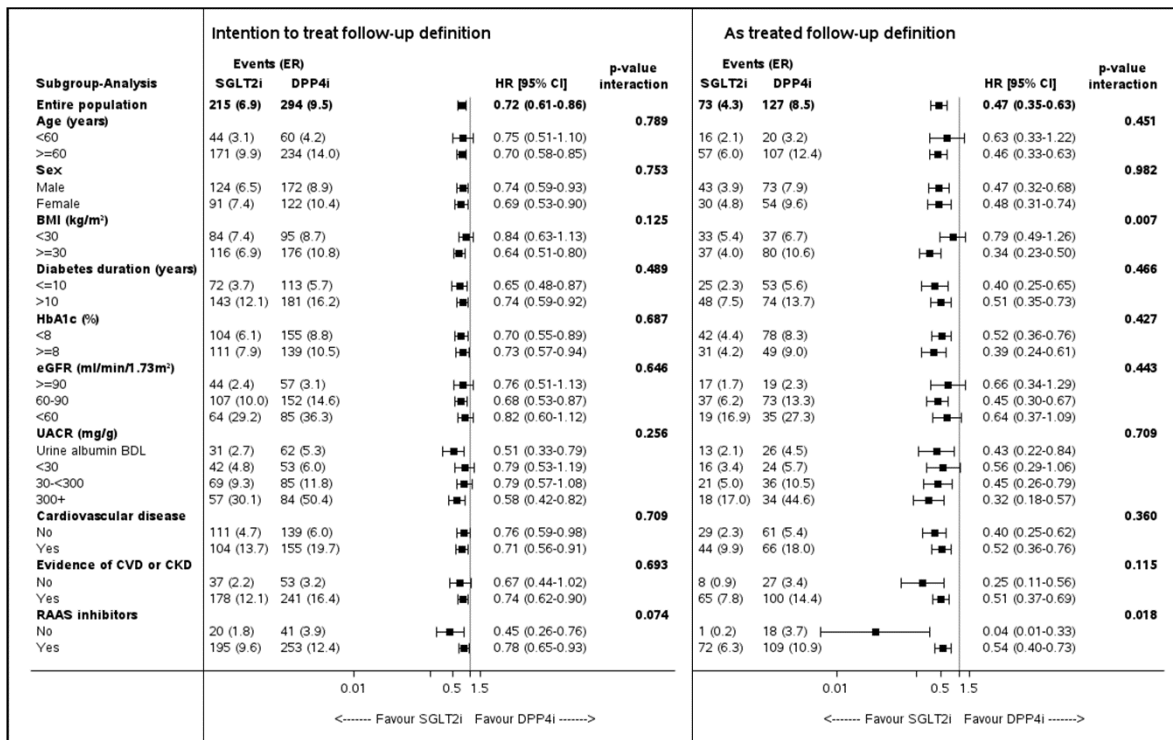

**B – Kidney-or-death outcome**

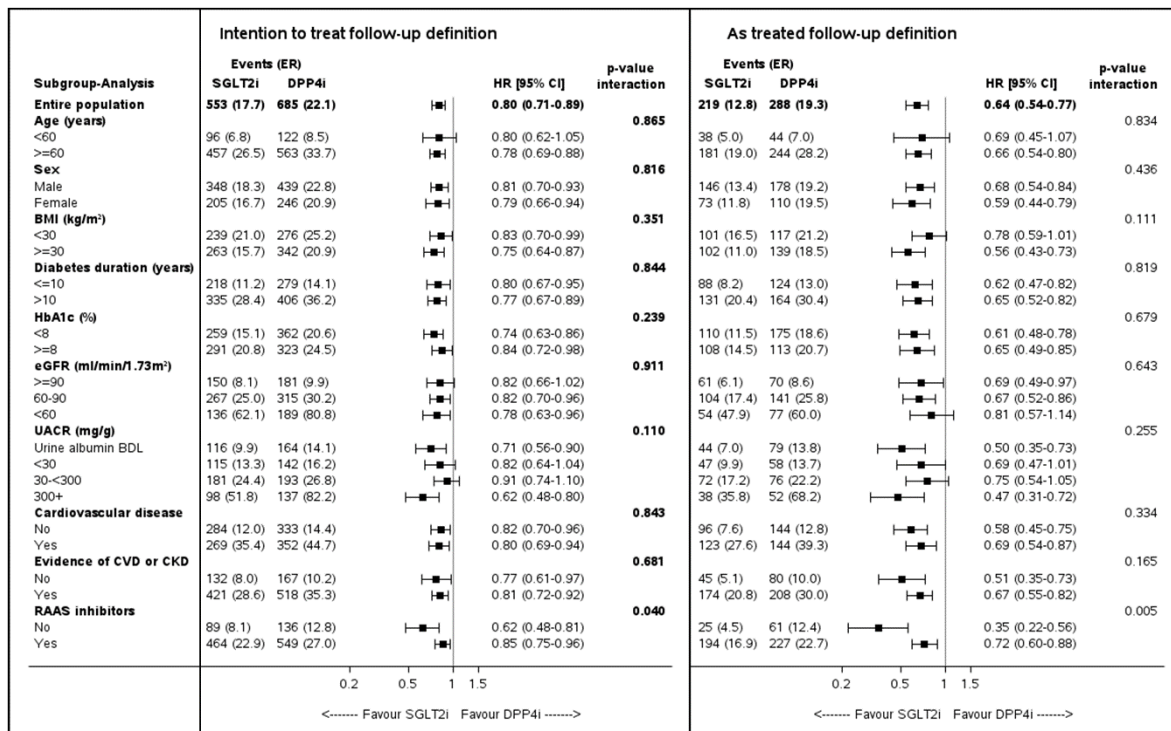

Supplement: cjasn-18-1153-s001.pdf [file cjasn-18-1153-s001.pdf]
